# Supplementary material
Source: Springer Nature journal article supplement (https://www.springermedizin.de/resource/supplementary/12913_2008_942_MOESM1_ESM.pdf/9536514)
Supplement: MOESM1 [file 9536514]

## *InterRAI Instrument*

**Clinical observations**  
(Data set)

**Scales**

**Clinical assessment protocols**

**Clinical profiles**

**Quality indicators**

**Casemix tools**

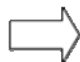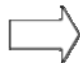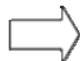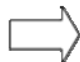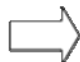

## *Stakeholders*

### **Clinicians**

Reliable clinical data  
Screeners  
Severity measures  
Care planning prompts

### **Service administrators**

Caseload evaluation  
Quality measures  
Benchmarking among services

### **Purchasing agencies**

Casemix measures  
Quality measures

### **Policymakers & planners**

Caseload comparison among  
services, regardless of setting  
Quality changes over time

### **Researchers**

Reliable clinical profiles drawn  
directly from service data  
Cross service comparisons  
International comparisons
